# Supplementary material for: A GCDGC-specific DNA (cytosine-5) methyltransferase that methylates the GCWGC sequence on both strands and the GCSGC sequence on one strand
Source: PubMed Central journal article supplement (PMC8936443; doi:10.1371/journal.pone.0265225), 2022-03-21
Supplement: pone.0265225.s001.pdf [file pone.0265225.s001.pdf]

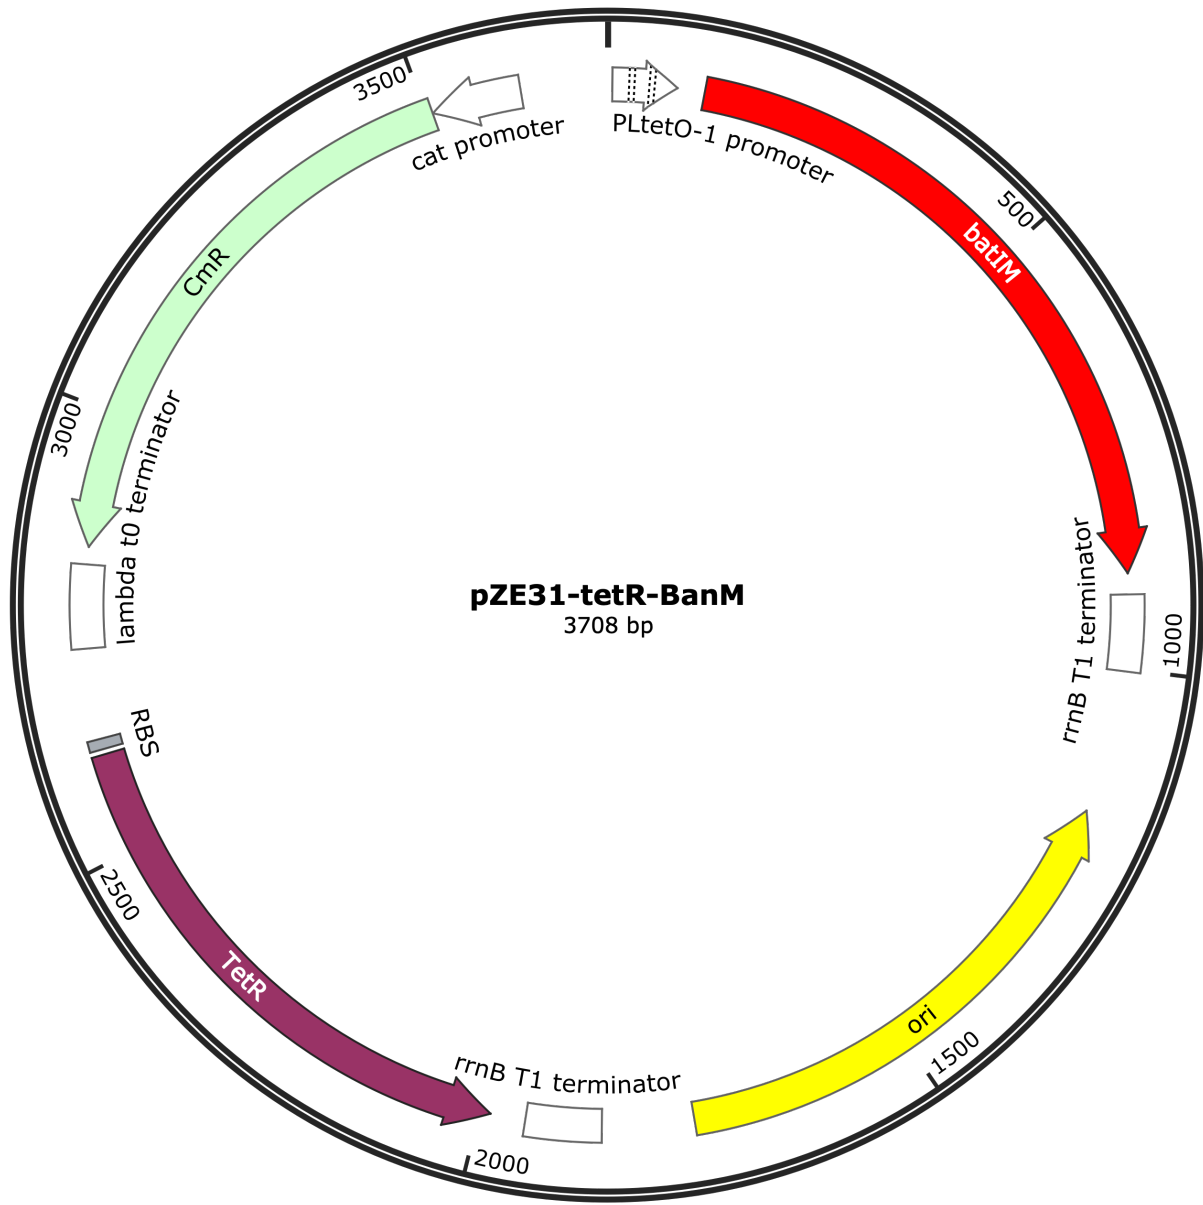

S1 Fig. Map of pZE31-*tetR-batIM*.
