# Supplementary material for: A GCDGC-specific DNA (cytosine-5) methyltransferase that methylates the GCWGC sequence on both strands and the GCSGC sequence on one strand
Source: PubMed Central journal article supplement (PMC8936443; doi:10.1371/journal.pone.0265225), 2022-03-21
Supplement: pone.0265225.s007.pdf [file pone.0265225.s007.pdf]

## Supporting Information. Annotation and sequence of pZE31-*tetR*-*batIM* in Genbank format.

```

LOCUS       Exported                               3708 bp ds-DNA   circular SYN 21-JAN-2022
DEFINITION synthetic circular DNA
ACCESSION   .
VERSION     .
KEYWORDS    .
SOURCE      synthetic DNA construct
  ORGANISM  synthetic DNA construct
REFERENCE   1 (bases 1 to 3708)
AUTHORS     CZC, Hokkaido University
TITLE       Direct Submission
JOURNAL     Exported Friday, Jan 21, 2022 from SnapGene 5.0.8
            https://www.snapgene.com
FEATURES             Location/Qualifiers
     source           1..3708
                     /organism="synthetic DNA construct"
                     /mol_type="other DNA"
     promoter         7..80
                     /label=PLtetO-1 promoter
                     /note="modified phage lambda PL promoter with tet operator
                     sites (Lutz and Bujard, 1997)"
     protein_bind     7..25
                     /gene="tetO"
                     /label=tet operator
                     /bound_moiety="tetracycline repressor TetR"
                     /note="bacterial operator O2 for the tetR and tetA genes"
     protein_bind     32..50
                     /gene="tetO"
                     /label=tet operator
                     /bound_moiety="tetracycline repressor TetR"
                     /note="bacterial operator O2 for the tetR and tetA genes"
     CDS              112..891
                     /codon_start=1
                     /locus_tag="AW20_RS24270"
                     /old_locus_tag="AW20_4689"
                     /product="DNA methylase"
                     /label=batIM
                     /note="Derived by automated computational analysis using
                     gene prediction method: Protein Homology."
                     /inference="COORDINATES:same species:RefSeq"
                     /protein_id="WP_000286272.1"
                     /translation="MYRSKESGLKMLDLCSGIAGISMAADWAGIDTAAAFCEIEEFNQKV
                     LRKNYPNIPIFPDLYKLMKQSLIDGGVDVDSIGVISAGYPCQGESLVGKRRGAEDERWL
                     WPEVFRLIKELRPTWVFGENVAGHVTMGLDVTLSDLEENYSTRTFVFPVAVSVGAPHQR
                     YRTFIVGHSNDKSKLQTDPRVVPFRSKWETWENTTGINRGTLSGTYWEENKPAICGMD
                     GTATRLDEDRLRFLGNVVPQQIYPIFEAIKIEGLL"
     terminator       916..1002
                     /gene="Escherichia coli rrnB"
                     /label=rrnB T1 terminator
                     /note="transcription terminator T1 from the E. coli rrnB
                     gene"
     rep_origin        complement(1167..1755)
                     /direction=LEFT
                     /label=ori
                     /note="high-copy-number ColE1/pMB1/pBR322/pUC origin of
                     replication"
     terminator       1861..1947
                     /gene="Escherichia coli rrnB"
                     /label=rrnB T1 terminator

```

```

/note="transcription terminator T1 from the E. coli rrnB
gene"
CDS complement(1988..2611)
/codon_start=1
/gene="tetR from transposon Tn10"
/product="tetracycline repressor TetR"
/label=TetR
/note="TetR binds to the tetracycline operator tetO to
inhibit transcription. This inhibition can be relieved by
adding tetracycline or doxycycline."
/translation="MSRLDKSKVINSALELLNEVGIEGLTTRKLAQKLGVEQPTLYWHV
KNKRALLDALAIEMLDHRHHTFCEPLEGESWQDFLRNNAKSFRCALLSHRDGAKVHLGTR
PTEKQYETLENQLAFLCQQGFSLENALYALSAVGHFTLGCVLEDQEHQVAKEERETPTT
DSMPPLLRQAIELFDHQGAEPAFLEGLLELIICGLEKQLKCESGS"
RBS 2618..2629
/note="strong bacterial ribosome binding site (Elowitz and
Leibler, 2000)"
terminator 2733..2827
/label=lambda t0 terminator
/note="transcription terminator from phage lambda"
CDS complement(2848..3507)
/codon_start=1
/gene="cat"
/product="chloramphenicol acetyltransferase"
/label=CmR
/note="confers resistance to chloramphenicol"
/translation="MEKKITGYTTVDISQWHRKEHFQSVQCTYNQTVQLDITAFLL
KTVKKNKHKFYPAFIHILARLMNAHPEFRMAMKDGELVIWDSVHPCYTVFHEQTEFSS
LWSEYHDDFRQFLHIYSQDVACVGENLAYFPKGFIEENMFVSPANPWSFTSFDLNVANM
DNFFAPVFTMGKYTQGDKVLMLAIQVHHAUCDFHVGMRMLNELQQYCDWEVQGA"
promoter complement(3508..3610)
/label=cat promoter
/note="promoter of the E. coli cat gene encoding
chloramphenicol acetyltransferase"
ORIGIN
1  ctcgagtccc  tatcagtgat  agagattgac  atccctatca  gtgatagaga  tactgagcac
61  atcagcagga  cgcaactgac  tgcaatcatc  caagtttcta  ccggcgaaat  tatgtacaga
121 agtaaggaat  ctggactgaa  aatgttagat  ttgtgttcgg  gaattgcagg  aataagtatg
181 gcagcgggatt  gggctggaat  tgatacagca  gccttttctg  aaatagagga  gttcaatcaa
241 aaagtactta  gaaagaacta  tcctaacatt  cctattttcc  cggatttata  taaacttatg
301 aaacaatcat  taatagatgg  aggtgttgac  gttgattcaa  ttggagttat  ttcagcagga
361 tatcctctgtc  aggagaaaag  tcttgttggg  aagcgaagag  gtgcagaaga  cgaaagatgg
421 ttatggccag  aagtcttcog  acttattaaa  gaactccggc  ccaacttggt  tgttggagaa
481 aatgttgctg  gacacgtcac  gatgggcttg  gacaccgtgc  tctccgactt  ggaagaagaa
541 aactactoga  caaggacggt  tgtatttccg  gctgtcagtg  tcggcgcgcc  gcatcaaaga
601 taccggacat  ttattgttgg  ccaactcaac  gacaagtcaa  aattacaaac  gatcccgaga
661 gttgtgccct  tcagaagcaa  atgggaaaca  tgggaaaca  ctaccgggat  caatcgggga
721 acactttccg  gaacatattg  ggaagaaaat  aaaccgcaa  tttgtggaat  ggatgatggg
781 actgccacaa  gattggacga  agatagattg  agattcttag  gaaacgcggt  tgtacctcag
841 cagatttatc  cgatatttga  agcagatagca  aagattgaag  gtttattata  accatggtac
901 gcgtgctaga  ggcataaat  aaaacgaaag  gctcagtcga  aagactgggc  ctttcgtttt
961 atctgttggt  tgtcggtgaa  cgctctcctg  agtaggacaa  atccgcgccc  ctagacctag
1021 ggcgttcggc  tgcggcgagc  ggtatcagct  cactcaaagg  cggtaatagc  gttatccaca
1081 gaatcagggg  ataacgcagg  aaagaacatg  tgagcaaaag  gccagcaaaa  ggccagggaac
1141 cgtaaaaagg  ccgcgttgct  ggcgttttcc  cataggctcc  gccccctga  cgagcatcac
1201 aaaaatcgac  gctcaagtca  gaggtggcga  aacccgacag  gactataaag  ataccaggcg
1261 tttccccctg  gaagctccct  cgtgcgctct  cctgttccga  ccctgccgct  tacgggatac
1321 ctgtccgctt  ttctcccttc  ttcctccctc  ggaagcgtg  gcgctttctc  aatgctcacg  ctgtaggtat
1381 ctcagttcgg  tgtaggctgt  tcgctccaag  ctgggctgtg  tgcacgaacc  ccccgttcag
1441 cccgaccgct  gcgccttatc  cggtaaactat  cgtcttgagt  ccaaccggt  aagacacgac
1501 ttatcgccac  tggcagcagc  cactggtaac  aggattagca  gagcgaggta  tgtaggcggt
1561 gctacagagt  tcttgaagtg  gtggcctaac  tacggctaca  ctagaaggac  agtatattggt
1621 atctgcgctc  tgctgaagcc  agttaccttc  ggaaaaagag  ttggtagctc  ttgatccggc

```

1681 aaacaaacca ccgctggtag cgggtggtttt tttgtttgca agcagcagat tacgcgcaga  
1741 aaaaaaggat ctcaagaaga tcctttgatc ttttctacgg ggtctgacgc tcagtggaac  
1801 gaaaactcac gttaagggat tttggctcatg tctgtgcaag tactactggt ctgcaggcgg  
1861 atttgtccta ctcaggagag cgttcaccca caaacaacag ataaaacgaa aggccagtc  
1921 tttcgactga gcctttcgtt ttatttgatg cctctagcac gcgtaccatg ggatcccca  
1981 tcaagcttta agaccactt tcacatttaa gttgtttttc taatccgcat atgatcaatt  
2041 caagccgaa taagaaggct ggctctgcac cttgggtgatc aaataattcg atagcttgtc  
2101 gtaataatgg cggcatacta tcagtagtag gtgtttccct ttcttcttta gcgacttgat  
2161 gctcttgatc ttccaatacg caacctaaag taaaatgccc cacagcgctg agtgcatata  
2221 atgcattctc tagtgaaaaa cctgtgtggc ataaaaaggc taattgattt tcgagagttt  
2281 catactgttt ttctgtaggc cgtgtaccta aatgtacttt tgctccatcg cgatgactta  
2341 gtaaagcaca tctaaaactt ttagcgttat tacgtaaaaa atcttgccag ctttcccctt  
2401 ctaaagggca aaagtgagta tgggtcctat ctaacatctc aatggctaag gcgctgagca  
2461 aagcccgtt attttttaca tgccaataca atgtaggctg ctctacacct agcttctggg  
2521 cgagtttacg ggttgttaaa ccttcgattc cgacctcatt aagcagctct aatgcgctgt  
2581 taactacttt acttttatct aatctagaca tggtagcttt ctctcttcta atgaattcgg  
2641 tcagtgcgtc ctgctgatgt gctcagtatc tgctaaaccg gtttaataac tcgaggtgaa  
2701 gacgaaaggg cctcgtgata cctagtgtt ggattctcac caataaaaaa cgcccggcgg  
2761 caaccgagcg ttctgaacaa atccagatgg agttctgagg tcattactgg atctatcaac  
2821 aggagtccaa gcgagctcga tatcaaatta cgccccgcc tgccactcat cgcagtactg  
2881 ttgtaattca ttaagcattc tgccgacatg gaagccatca cagacggcat gatgaacctg  
2941 aatcgccagc ggcatcagca cctgtcggc ttgcgataa tatttgcca tggtgaaaac  
3001 gggggcgaag aagtgtcca tattggccac gtttaaataa aaactgggta aactcaccca  
3061 gggattggct gagacgaaaa acatattctc aataaacctt ttagggaaat aggccaggtt  
3121 ttcaccgtaa cacgccacat cttgcgaata tatgtgtaga aactgccgga aatcgtcgtg  
3181 gtattcactc cagagcgatg aaaacgtttc agtttgctca tggaaaacgg tgtaacaagg  
3241 gtgaacacta tcccatatca ccagctcacc gtctttcatt gccatacga attccggatg  
3301 agcattcatc aggcgggcaa gaatgtgaat aaaggccgga taaaacttgt gcttattttt  
3361 ctttacggtc tttaaaaagg ccgtaatatc cagctgaacg gtctggttat aggtacattg  
3421 agcaactgac tgaaatgcct caaaatgttc tttacgatgc cattgggata tatcaacggg  
3481 ggtatatcca gtgatTTTT tctccatttt agcttcctta gctcctgaaa atctcgataa  
3541 ctcaaaaaat acgcccggta gtgatcttat ttcattatgg tgaaagttgg aacctcttac  
3601 gtgccgatca acgtctcatt ttcgccagat atcgacgtct aagaaacctat tattatcatg  
3661 acattaacct ataaaaatag gcgtatcac aggccctttc gtcttcac

//
