# Supplementary material for: A GCDGC-specific DNA (cytosine-5) methyltransferase that methylates the GCWGC sequence on both strands and the GCSGC sequence on one strand
Source: PubMed Central journal article supplement (PMC8936443; doi:10.1371/journal.pone.0265225), 2022-03-21
Supplement: pone.0265225.s008.pdf [file pone.0265225.s008.pdf]

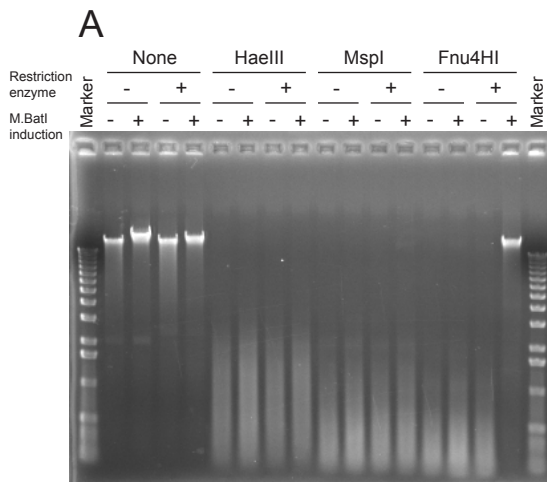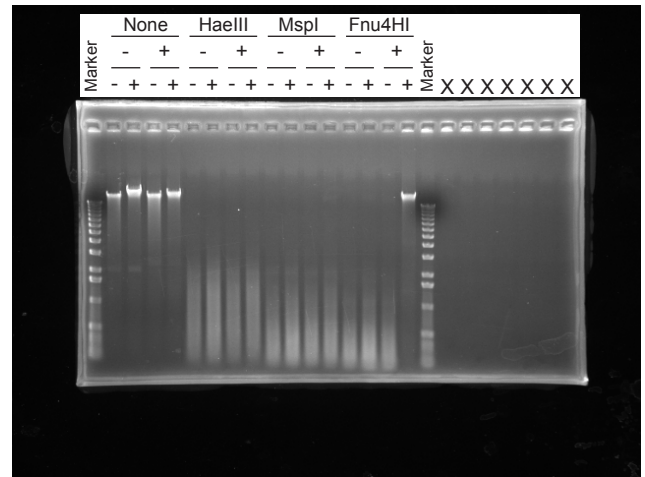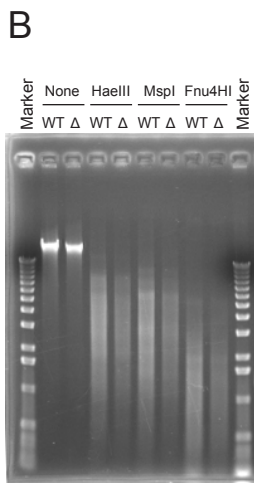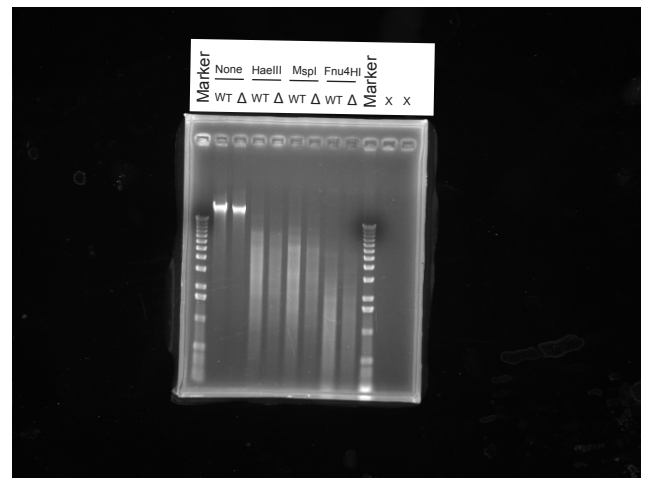

**Fig 2.** Adjusted figures are on the left and their raw images are on the right. Gel images were captured by AE-6933 Printgraph system (ATTO, Tokyo, Japan).

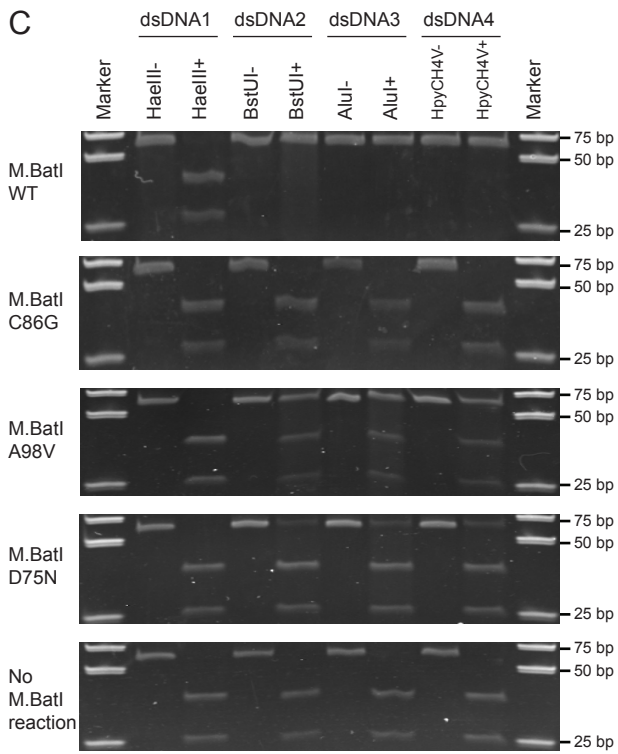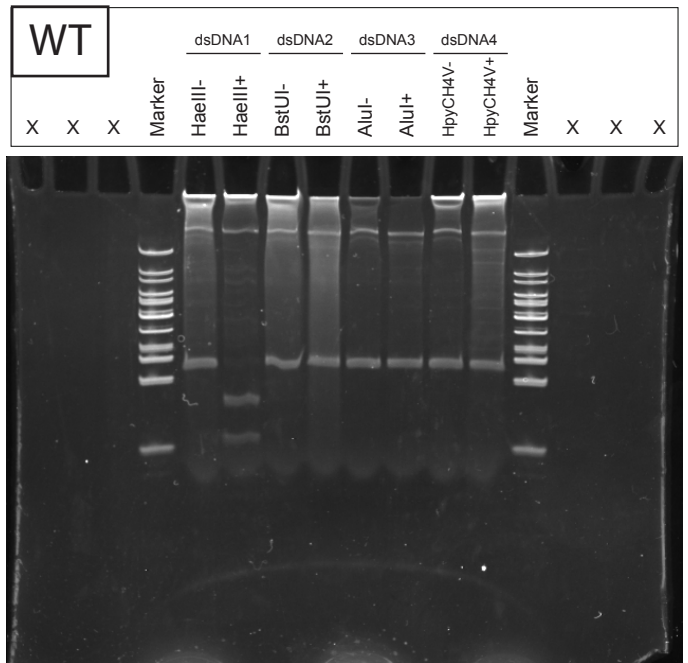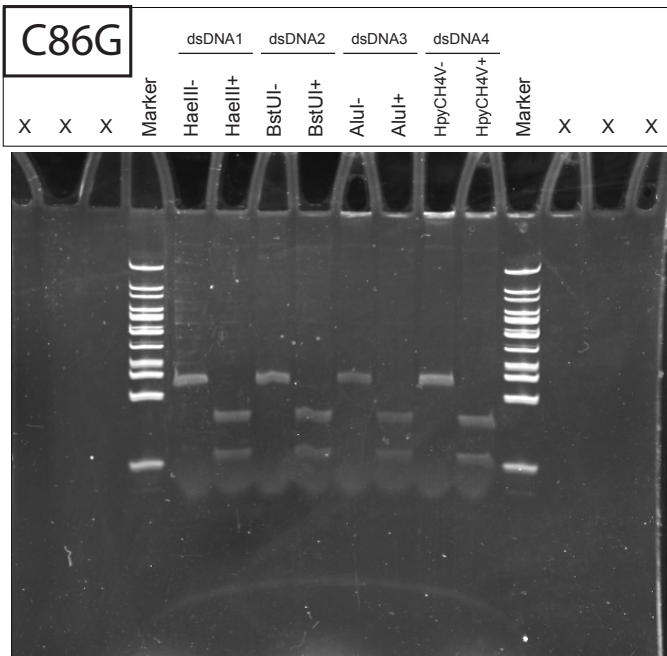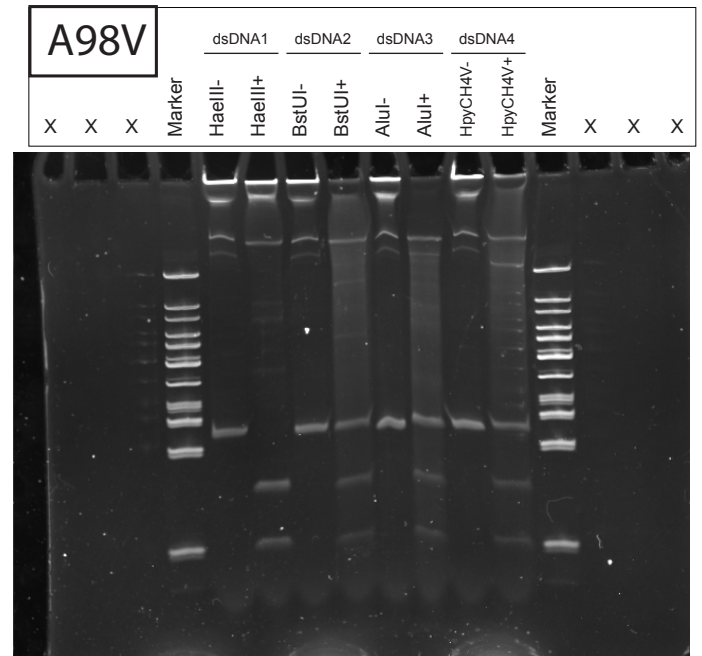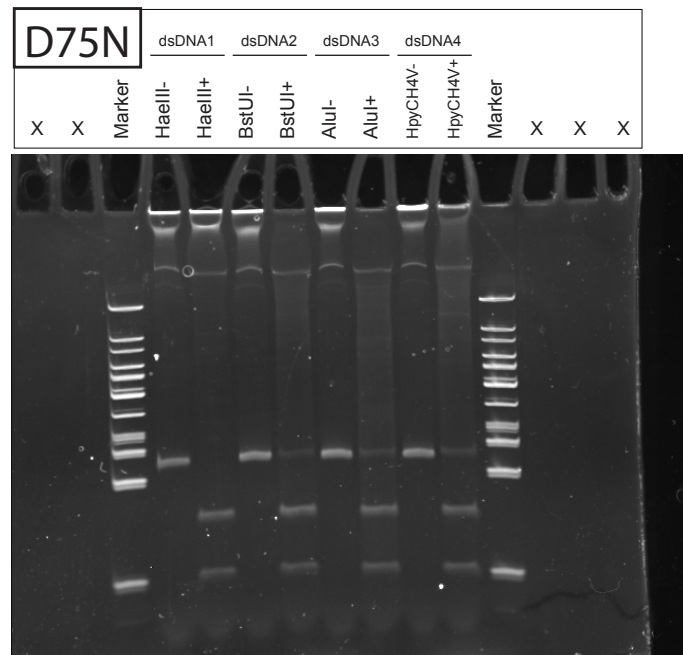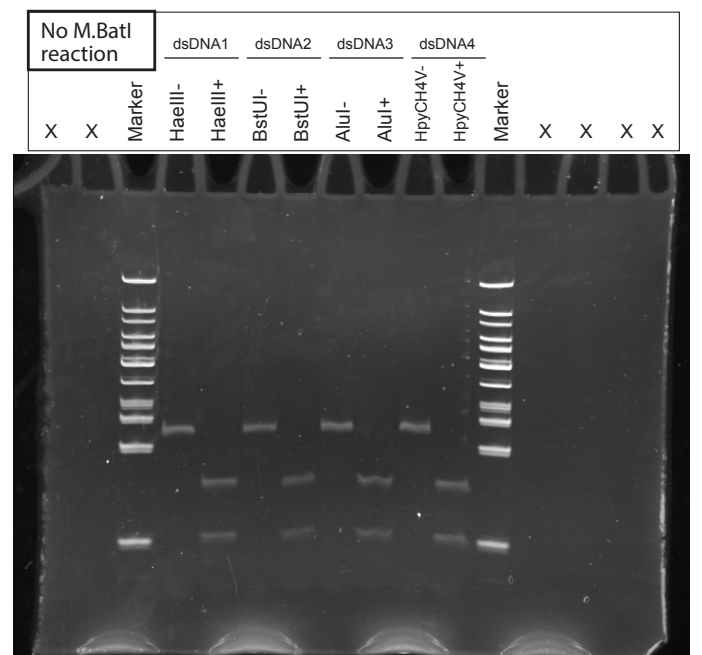

**Fig 3.** Adjusted figure is on the top left and its raw images are shown. Gel images were captured by AE-6933 Printgraph system (ATTO, Tokyo, Japan).



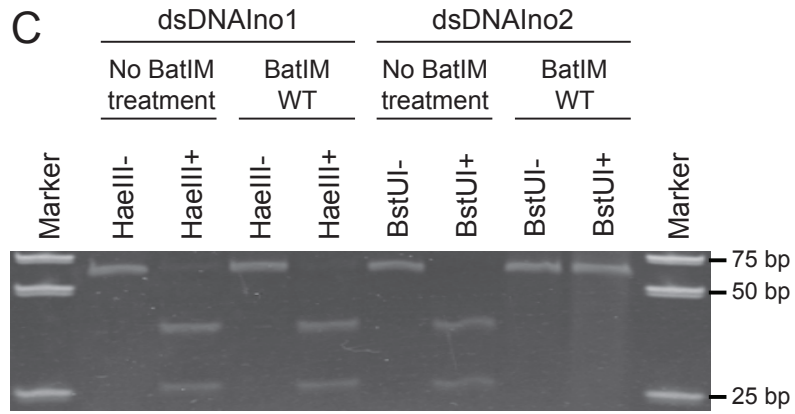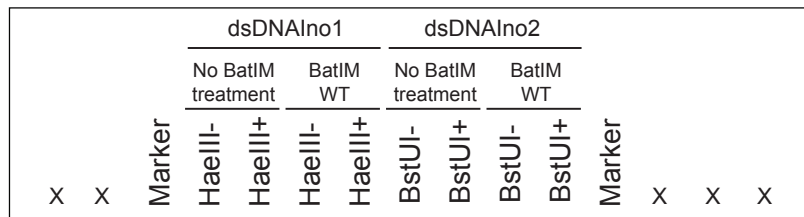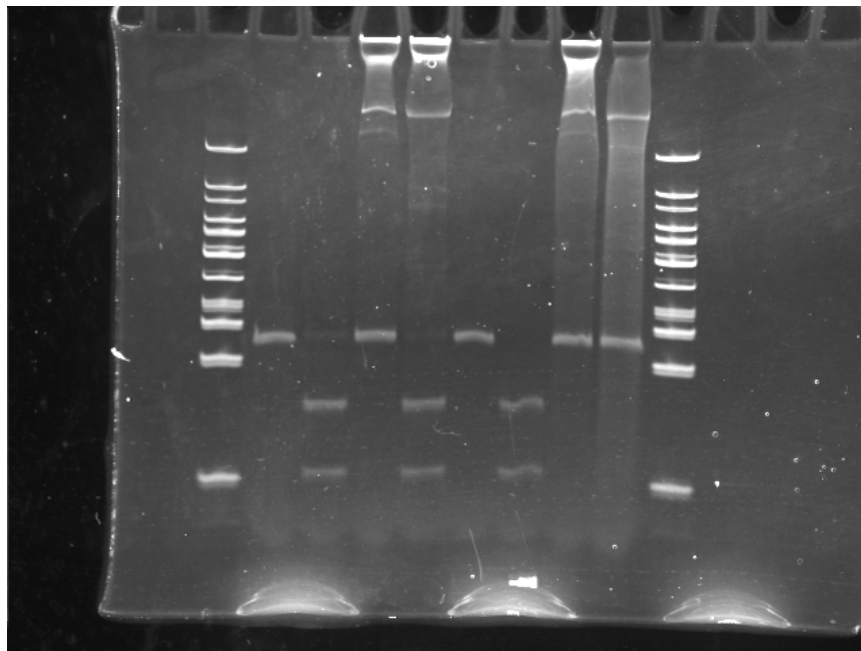

**S3 Fig.** Adjusted figures is on the top and its raw image is at the bottom. Gel images were captured by AE-6933 Printgraph system (ATTO, Tokyo, Japan).
