# Supplementary material for: A GCDGC-specific DNA (cytosine-5) methyltransferase that methylates the GCWGC sequence on both strands and the GCSGC sequence on one strand
Source: PLoS One. 2022 Mar 21;17(3):e0265225. doi: 10.1371/journal.pone.0265225 (PMC8936443; doi:10.1371/journal.pone.0265225)
Supplement: S2 Fig — Conserved motifs of cytosine methyltransferase were colored. The region corresponding to target recognition domain were indicated with red line above the alignment. In M.BatI sequence, letters of residues of variants we constructed were colored in red. (PDF) [file pone.0265225.s002.pdf]

|                      | Motif I        |                           |            |            |            |              |  |
|----------------------|----------------|---------------------------|------------|------------|------------|--------------|--|
|                      | 1              |                           |            |            |            |              |  |
| GBAA_RS18520(M.BatI) | ---MYRSKES     | GLKMLDLCSG                | IAGISMAADW | A--GI-DTAA | FCEIE----- | EFNQKVLRLKN  |  |
| BMB171_RS12805       | -----          | -MKMLDLCSG                | IAGISMAADW | A--GI-NTAA | FCEIE----- | EFNQKVLRLKN  |  |
| CN616_RS22970        | -----          | -MKMLDLCSG                | IAGVSMADW  | A--GI-ETAA | FCEIE----- | EFNQKVLRLKN  |  |
| HhaIM                | MIEIKDKQLT     | GLRFIDLFAG                | LGGFRLALES | C--GA-ECVY | SNEW-----  | KYAQEVYEMN   |  |
| Sau3AIM              | -----MN        | KIKVVELEAG                | VGGFRLGLEN | TKNGIFDITW | ANQWEPSRKI | QHAFDCYSKR   |  |
|                      |                |                           |            | Motif IV   |            |              |  |
|                      | 61             |                           | D75        | C86        | A98        |              |  |
| GBAA_RS18520(M.BatI) | YP-NIPIFPD     | LYKLMKQSLI                | DGGVDVDSIG | VISAGYPCQG | ESLV---GKR | RGAEDEDER-WL |  |
| BMB171_RS12805       | YP-NIPIFPD     | LYKLTKQSLI                | DGGVDVDSIG | VISAGYPCQG | ESMA---GKR | KGAEDEDER-WL |  |
| CN616_RS22970        | YP-NIPIFPD     | LYKLTKQSLI                | DGGVDVDAIG | VISAGYPCQG | ESLV---GKR | RGAEDEDER-WL |  |
| HhaIM                | F--GEKPEGD     | ITQVNEKTIP                | DH--D----- | ILCAGFPCQA | FSIS---GKQ | KGFEDSRGTL   |  |
| Sau3AIM              | FKNGIHSNKD     | IAQVSDEEMA                | NTEAD----- | MIVGGFPCQD | YSVARSLNGE | LGIQGGKGV    |  |
|                      |                |                           |            |            |            |              |  |
|                      | 121            | Motif VI                  |            |            |            |              |  |
| GBAA_RS18520(M.BatI) | WPEVFRLIKE     | LRPTWVFGEN                | V-----AG   | HVTMGLDTVL | SDLEENYST  | RTFVFPVAVSV  |  |
| BMB171_RS12805       | WPEVFRLIRE     | LRPTWVFGEN                | V-----AG   | HVTMGLDTVL | SDLEENYST  | RTFVLPVAVSV  |  |
| CN616_RS22970        | WPEVFRLIRE     | LRPTWVFGEN                | V-----AG   | HVTMGLDTVL | SDLEENYST  | RTFVLPVAVSV  |  |
| HhaIM                | FFDIARIVRE     | KKPKVVFME                 | VKNF---ASH | DNGNTLEVVK | NTMNELDYSF | HAKVLNALDY   |  |
| Sau3AIM              | FWQIIRYIQN     | TFPKYLLLEN                | VDRLLKSPSS | QRGRDFAVML | STLNELGYNV | EWRVINAADY   |  |
|                      |                |                           |            |            |            |              |  |
|                      | 181            | Motif VIII                |            |            |            |              |  |
| GBAA_RS18520(M.BatI) | GAPHQRYRTF     | IVGHSNDKS-                | -----      | KLQTDPRVVP | FRSKWETWEN | TTGINRGTL    |  |
| BMB171_RS12805       | GAPHQRYRTF     | IVGHSNDKP-                | -----      | KLQANKKIIP | FRSKRQPWKT | TSGIDRGALS   |  |
| CN616_RS22970        | GAPHQRYRTF     | IIGHSDNKS-                | -----      | KLQADPRVVP | FRSKREARKN | TTRINRGTL    |  |
| HhaIM                | GIPOKRERIY     | MICFRNDLN-                | -----      | ---IQNFQFP | KPFELNTFVK | DL LLPDSEVE  |  |
| Sau3AIM              | GNAQRRRRVF     | IFGYKQDLNY                | SKAMEESPLD | KIIYHNLFA  | EAFPIEDYAN | KNRVNRTHIT   |  |
|                      |                |                           |            |            |            |              |  |
|                      | 241            | Target recognition domain |            |            |            |              |  |
| GBAA_RS18520(M.BatI) | -----          | -----                     | -----      | -----      | -----      | -----        |  |
| BMB171_RS12805       | -----          | -----                     | -----      | -----      | -----      | -----        |  |
| CN616_RS22970        | -----          | -----                     | -----      | -----      | -----      | -----        |  |
| HhaIM                | HLVIDRKDL-     | -----VM                   | TNQEIE--QT | TP---KTVRL | G-----     | -----        |  |
| Sau3AIM              | HDIVDISDNF     | SFQFYNSGIM                | KNGEILTIDT | IPKYEKSVTL | GEIIESNVDD | GFSLNQDQID   |  |
|                      |                |                           |            |            |            |              |  |
|                      | 301            |                           |            |            |            |              |  |
| GBAA_RS18520(M.BatI) | -----          | -----G                    | TYWEEN---- | -----      | -----      | -----        |  |
| BMB171_RS12805       | -----          | -----G                    | TYWEEN---- | -----      | -----      | -----        |  |
| CN616_RS22970        | -----          | -----R                    | IYWEEN---- | -----      | -----      | -----        |  |
| HhaIM                | -----          | IVGKGQGER                 | IYSTRG---- | -----IAIT  | LSAYGGGIFA | KTGGYLVNGK   |  |
| Sau3AIM              | KFKYLRGPKK     | IKRTTKDGHE                | YYFSEGGMSE | TDSLELPART | MLTSESSINR | STHFLNVDGV   |  |
|                      |                |                           |            |            |            |              |  |
|                      | 361 (Motif IX) |                           |            | Motif X    |            |              |  |
| GBAA_RS18520(M.BatI) | ----KPAIC-     | ---GMDDGTA                | TRLD-EDRLR | FLGNAVVPQQ | IYPIFEAIAK | IEGLL-----   |  |
| BMB171_RS12805       | ----KPAVC-     | ---GMDDGTA                | ARLD-EDRLR | FLGNAVVPQQ | IYPIFEAIAK | IEGLL-----   |  |
| CN616_RS22970        | ----QPAIC-     | ---GMDDGTA                | TRLD-EDRLR | FLGNAVVPQQ | IYPIFEAIAK | IEGLL-----   |  |
| HhaIM                | TRKLHPRECA     | RVMGYPDSYK                | VHPSTSQAYK | QFGNSVVINV | LQYIAYNIGS | SLNFK-----   |  |
| Sau3AIM              | YRTLTPIEAE     | RLNGFPDNWT                | EGMPIKMRYF | CMGNALVPL  | ITRIGNQIEK | IDSITNDEFS   |  |
|                      |                |                           |            |            |            |              |  |
|                      | 421            |                           |            |            |            |              |  |
| GBAA_RS18520(M.BatI) | -----          |                           |            |            |            |              |  |
| BMB171_RS12805       | -----          |                           |            |            |            |              |  |
| CN616_RS22970        | -----          |                           |            |            |            |              |  |
| HhaIM                | ---PY          |                           |            |            |            |              |  |
| Sau3AIM              | QLRLF          |                           |            |            |            |              |  |

**S2 Fig. Alignment of M.BatI and its homologs together with other representative cytosine methyltransferase.** Conserved motifs of cytosine methyltransferase were colored. The region corresponding to target recognition domain were indicated with red line above the alignment. In M.BatI sequence, letters of residues of variants we constructed were colored in red.
